# Supplementary material for: ncRNA-Mediated High Expression of LPCAT1 Correlates with Poor Prognosis and Tumor Immune Infiltration of Liver Hepatocellular Carcinoma
Source: Hindawi journal article supplement (doi:10.1155/2022/1584397), 2022-05-16

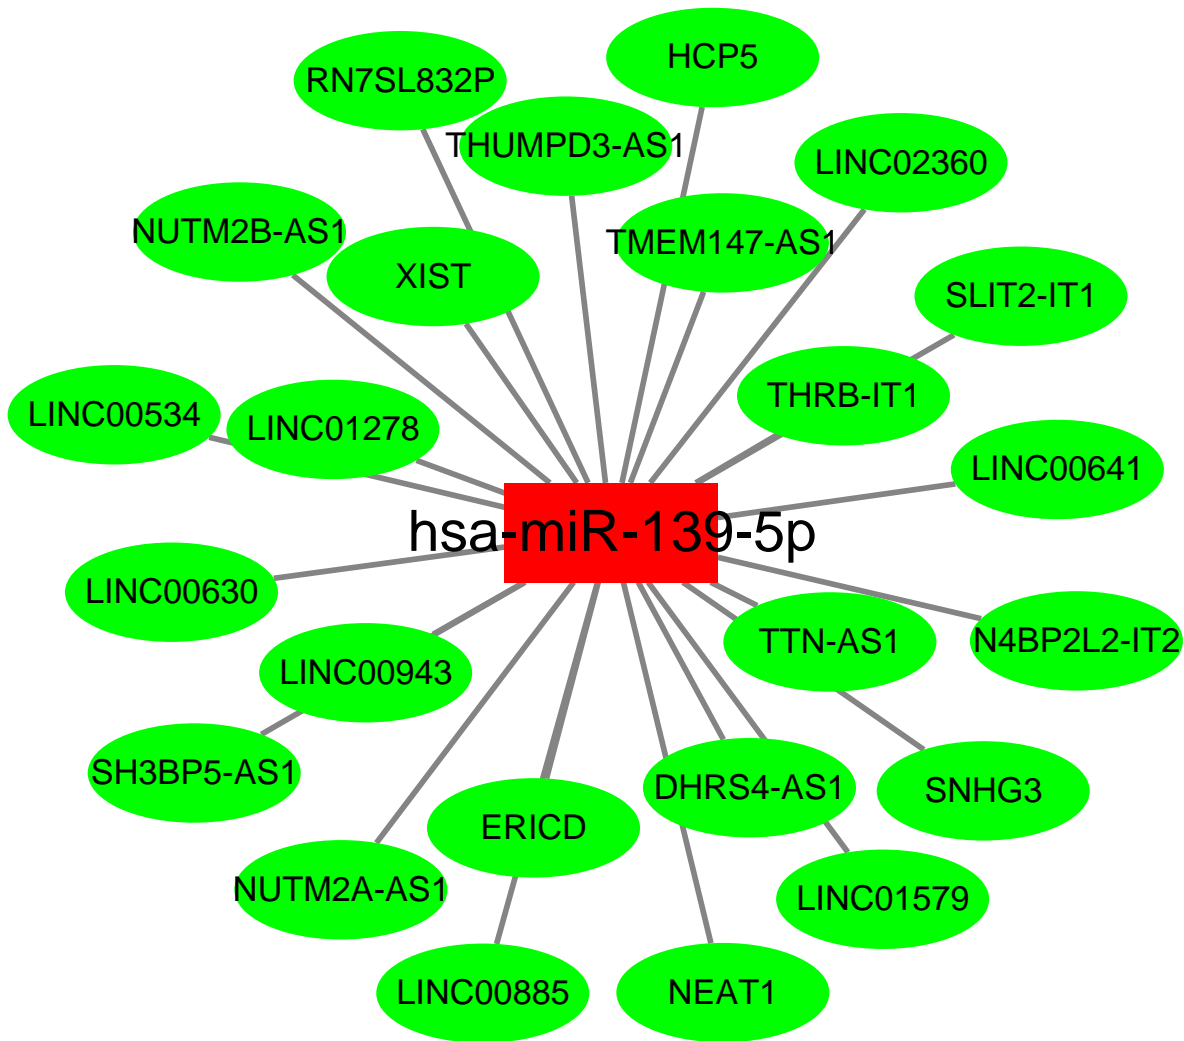

Supplement: f1 [file 1584397.f1.pdf]
